# Supplementary material for: Synthesis, characterization and pulse radiolysis of cobalt(ii) complexes of 2-picolinate and polypyridyl ligands
Source: Royal Society of Chemistry journal article supplement (doi:10.1039/b925220g), 2010-01-01
Supplement: b925220g.pdf [file b925220g.pdf]

## Supplementary Information

### Synthesis, Characterization and Pulse Radiolysis of Cobalt (II) Complexes of 2-Picolinate and Polypyridyl Ligands

Vitthal A. Kawade,<sup>a</sup> Avinash S. Kumbhar,<sup>\*a</sup> Devidas B. Naik<sup>b</sup> and Ray J. Butcher<sup>c</sup>

<sup>a</sup> National Centre for Free Radical Research, Department of Chemistry, University of Pune, Pune 411007 (India)

Fax: (+91)- 020- 25691728 E-mail: [askum@chem.unipune.ernet.in](mailto:askum@chem.unipune.ernet.in)

<sup>b</sup> Radiation and Photochemistry Division, BARC, Mumbai 400085, (India)

<sup>c</sup> Chemistry Department, Howard University, Washington D.C. 20059, (USA)

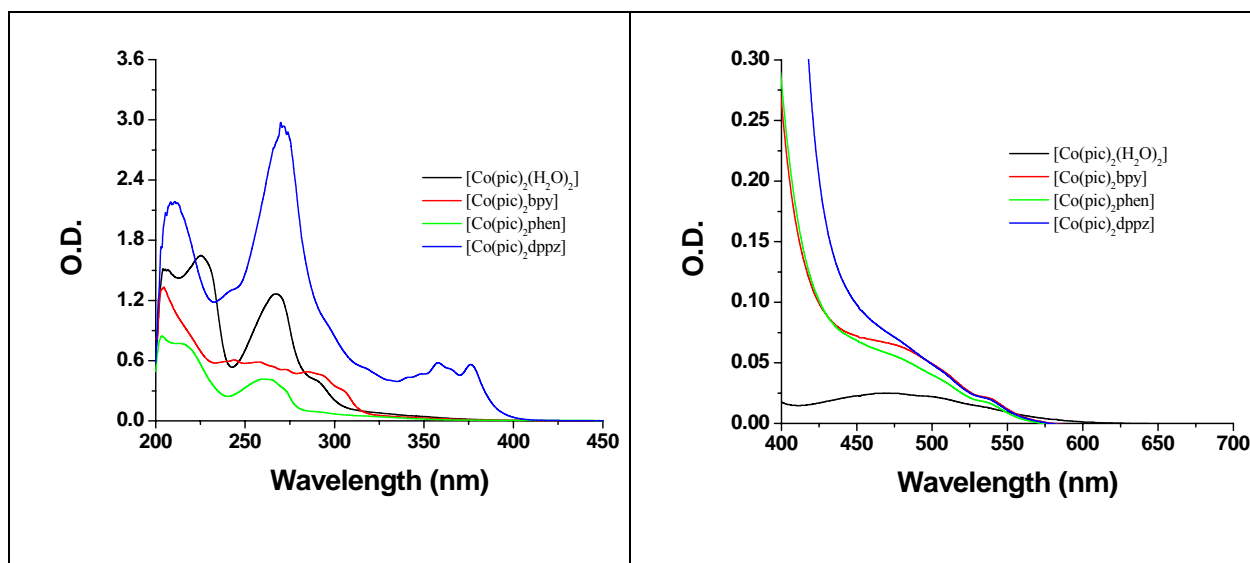

**Fig. S1** Absorption spectra of cobalt(II) complexes of 2-pyridine carboxylic acid and polypyridyl ligands in methanol medium.

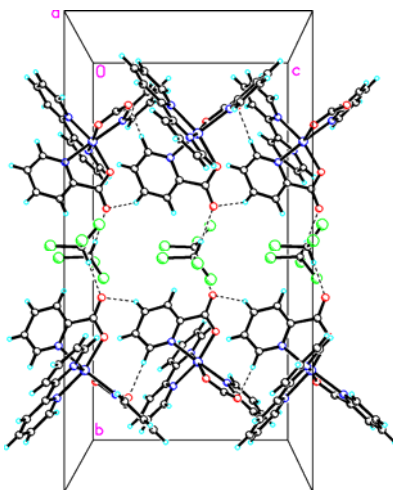

**Fig. S2** The crystal packing diagram of complex **2** showing the hydrogen bond interaction as dashed lines.

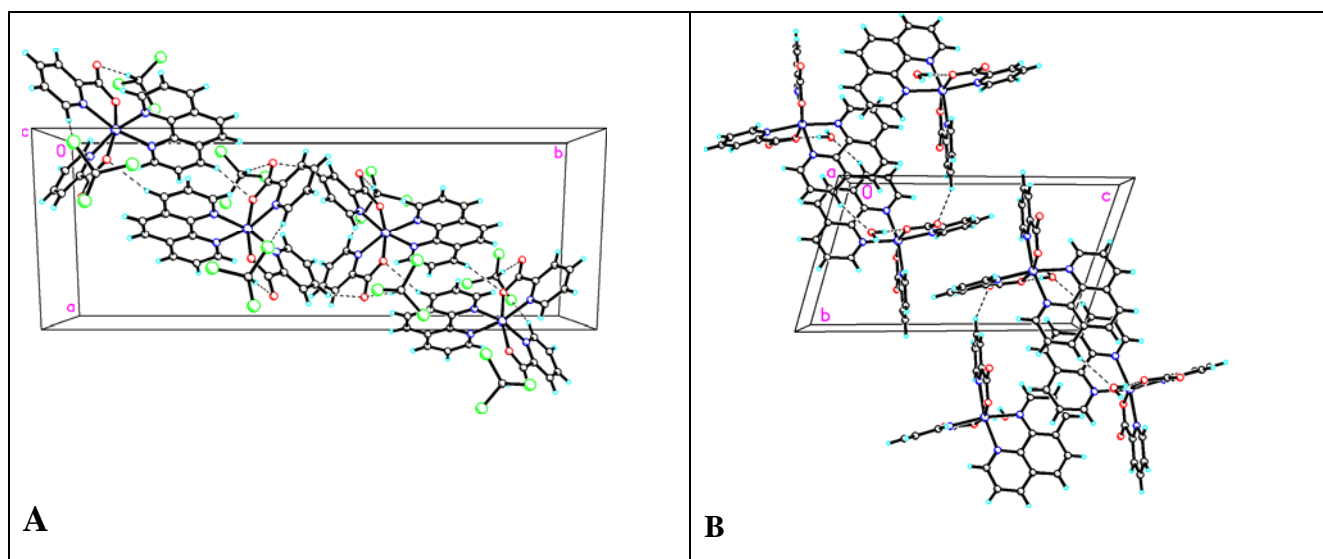

**Fig. S3** The crystal packing diagram of complex **3** showing the hydrogen bond interaction as dashed lines **A**) with chloroform **B**) water molecule.

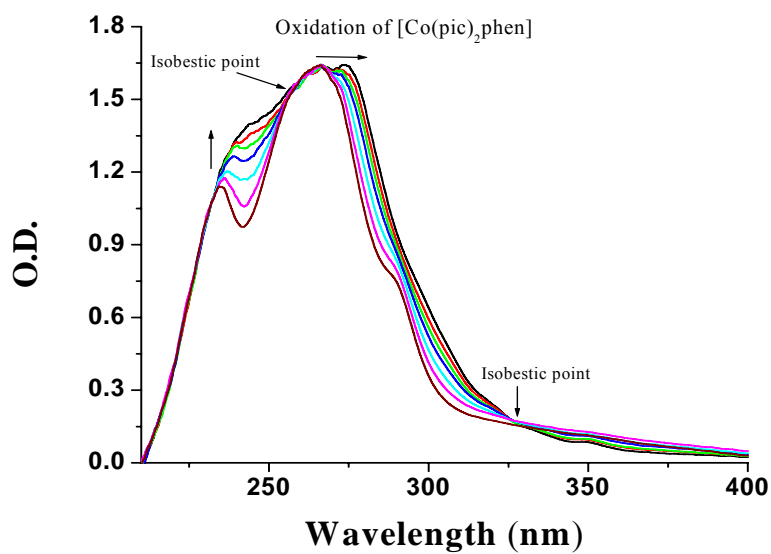

**Fig. S4** Time resolved UV spectral changes of complex **3** during the oxidation in  $\text{CH}_3\text{CN}$  solution containing  $0.1 \text{ mol dm}^{-3}$  TEAP.

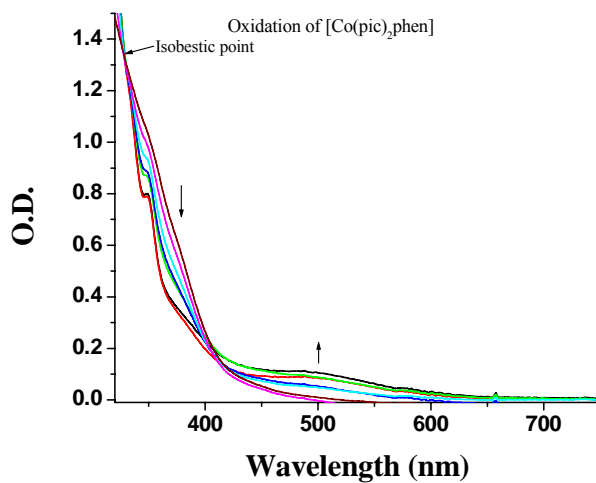

**Fig. S5** Time resolved UV-Visible spectral changes of complex **3** during the oxidation in  $\text{CH}_3\text{CN}$  solution containing  $0.1 \text{ mol dm}^{-3}$  TEAP.

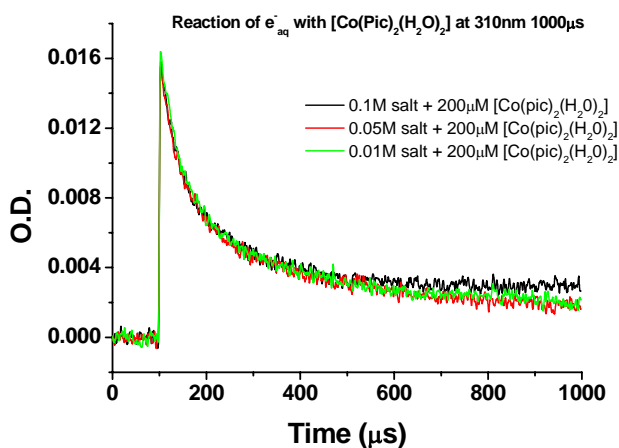

**Fig. S6** Decay traces of transient species at 310 nm in the reaction of  $\text{e}^-_{\text{aq}}$  with the complex **1** with different concentration of  $\text{NaClO}_4$ .

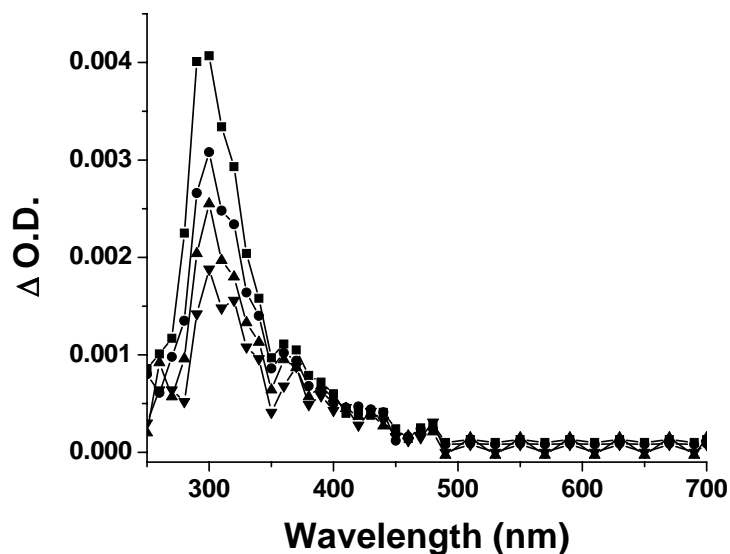

**Fig. S7** Time resolved transient absorption spectra observed on the reaction of  $(\text{CH}_3)_2\text{COH}$  radicals with  $\text{N}_2\text{O}$  saturated aqueous solution of  $2 \times 10^{-4} \text{ mol dm}^{-3}$  complex **1** containing  $1 \text{ mol dm}^{-3}$  isopropanol at 4.6(■), 25(●), 60(▲) and 125(▼)  $\mu\text{s}$  after the electron pulse. Dose /Pulse 14.4 Gy.

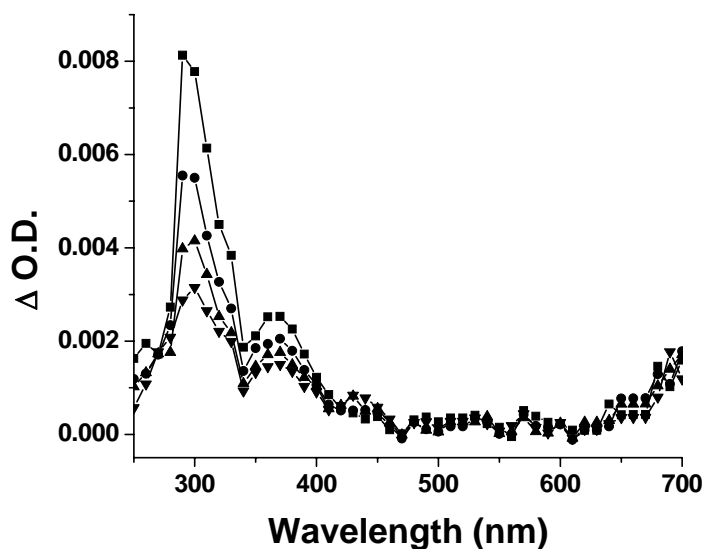

**Fig. S8** Time resolved transient absorption spectra observed on the reaction of  $\text{CO}_2^{\cdot-}$  radicals with  $\text{N}_2\text{O}$  saturated aqueous solution of  $2 \times 10^{-4} \text{ mol dm}^{-3}$  complex **1** containing  $0.25 \text{ mol dm}^{-3}$   $\text{HCOONa}$  at 4(■), 25(●), 60(▲), and 125(▼)  $\mu\text{s}$  after the electron pulse. Dose /Pulse 12.7 Gy.

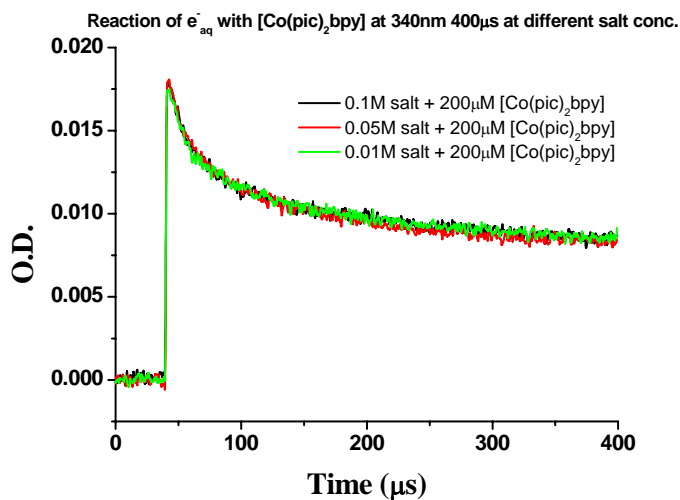

**Fig. S9** Decay traces of transient species at 340 nm in the reaction of  $e^-_{aq}$  with the complex **2** with different concentration of  $\text{NaClO}_4$ .

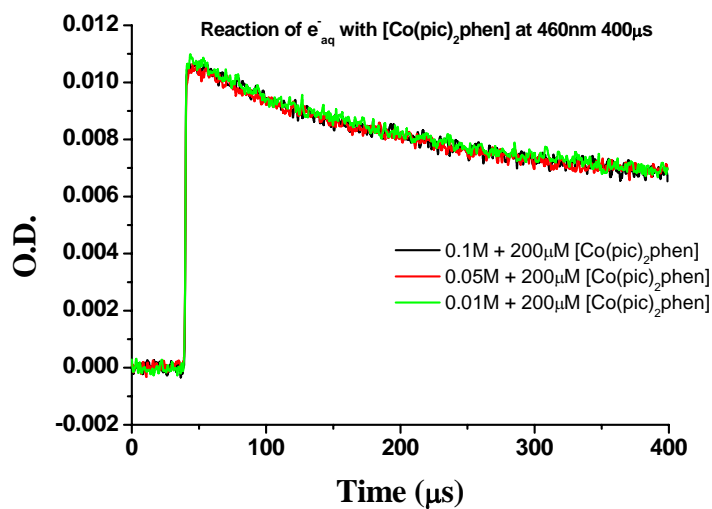

**Fig. S10** Decay traces of transient species at 460 nm in the reaction of  $e^-_{aq}$  with the complex **3** with different concentration of  $\text{NaClO}_4$ .

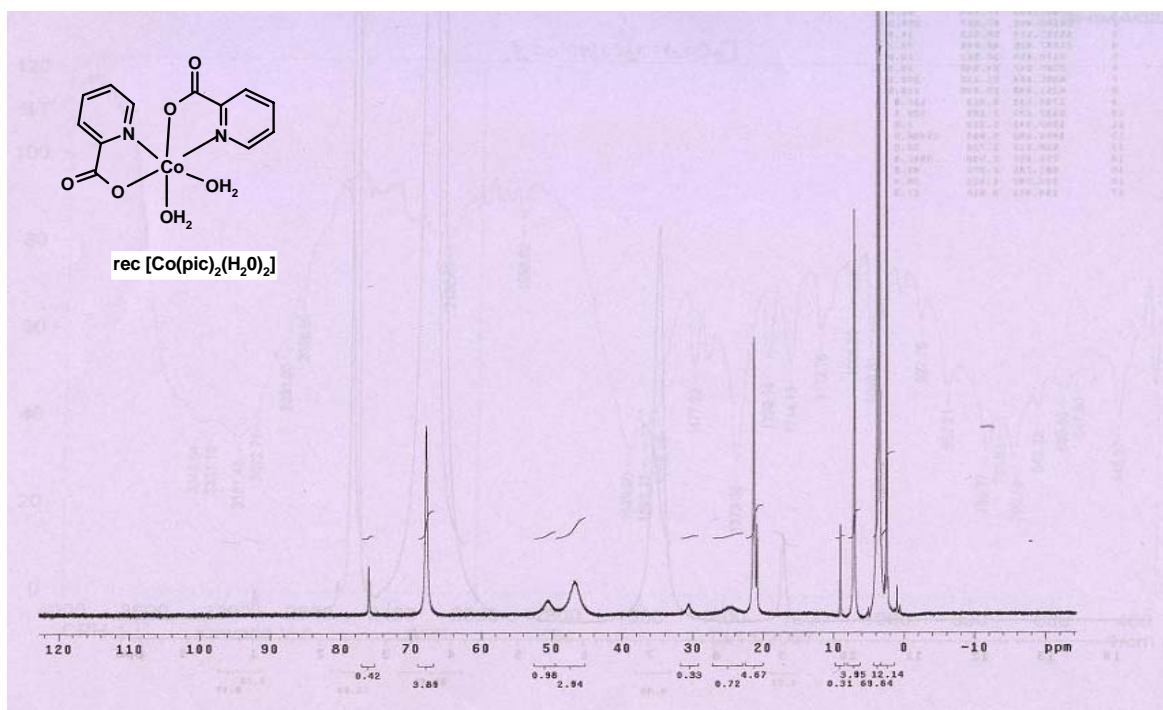

**Fig. S11** <sup>1</sup>H NMR of complex **1** in DMSO-*d*<sub>6</sub> solvent.

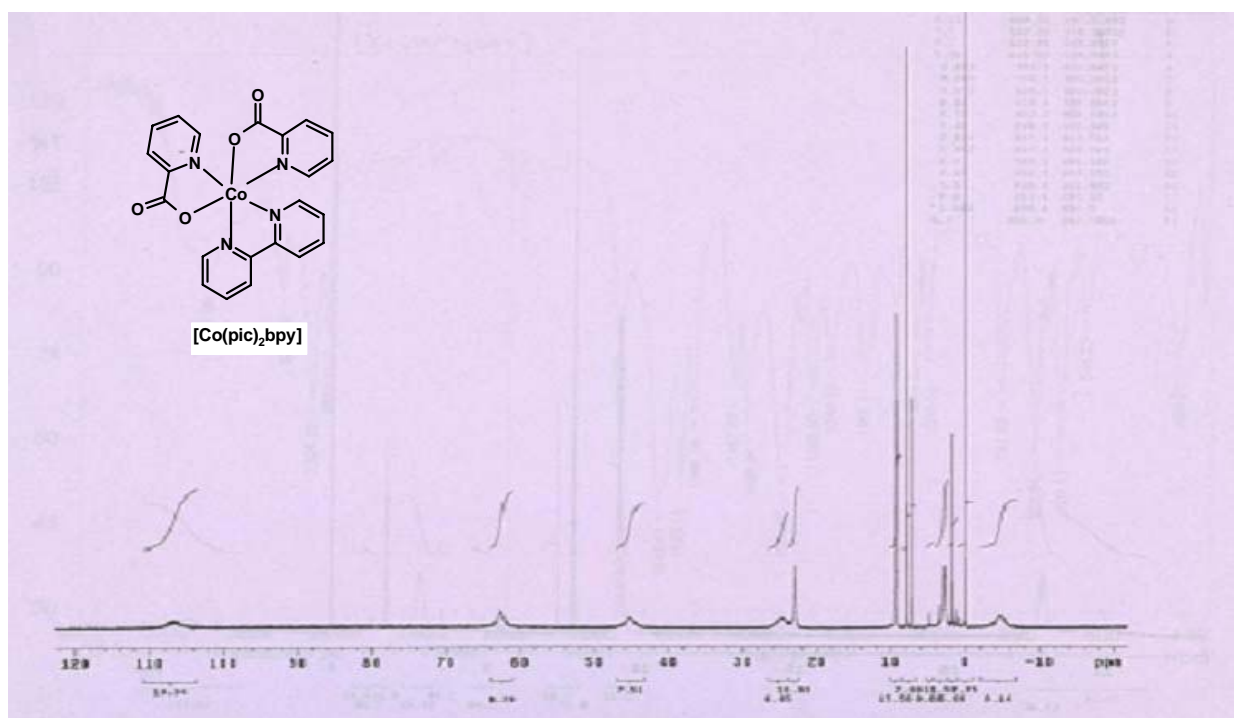

**Fig. S12** <sup>1</sup>H NMR of complex **2** in CDCl<sub>3</sub> solvent.

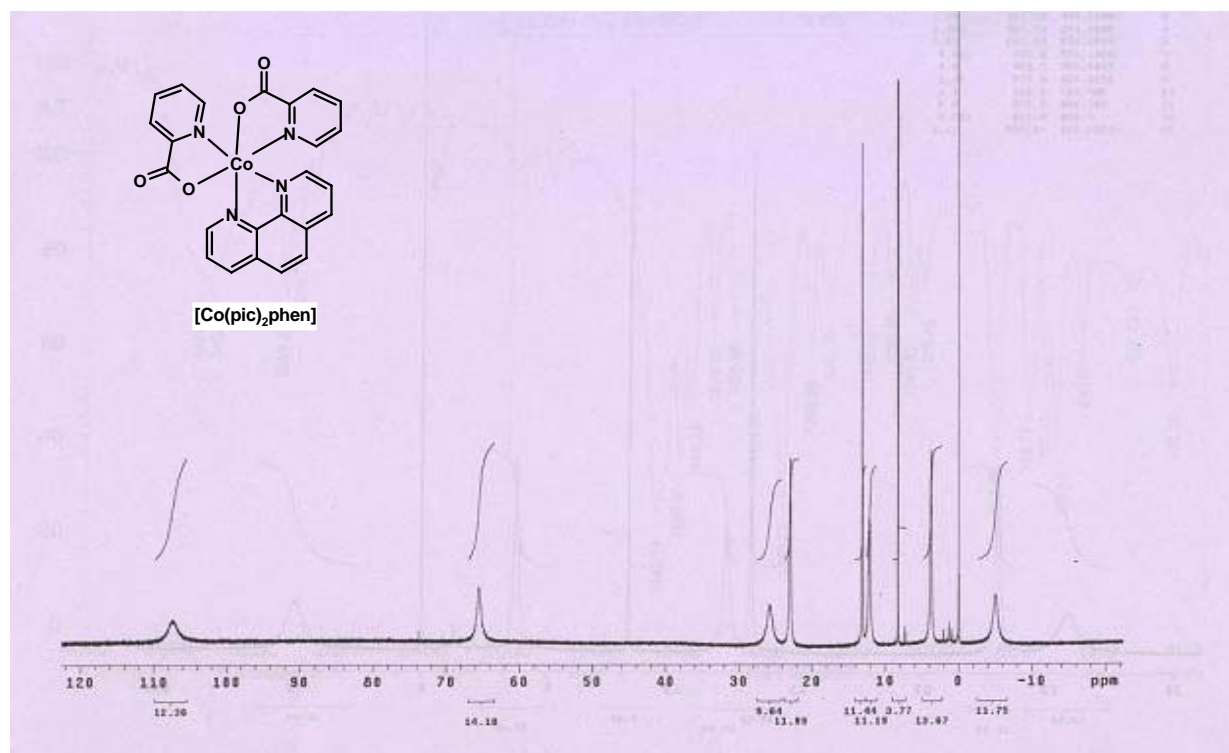

Fig. S13  $^1\text{H}$  NMR of complex **3** in  $\text{CDCl}_3$  solvent.

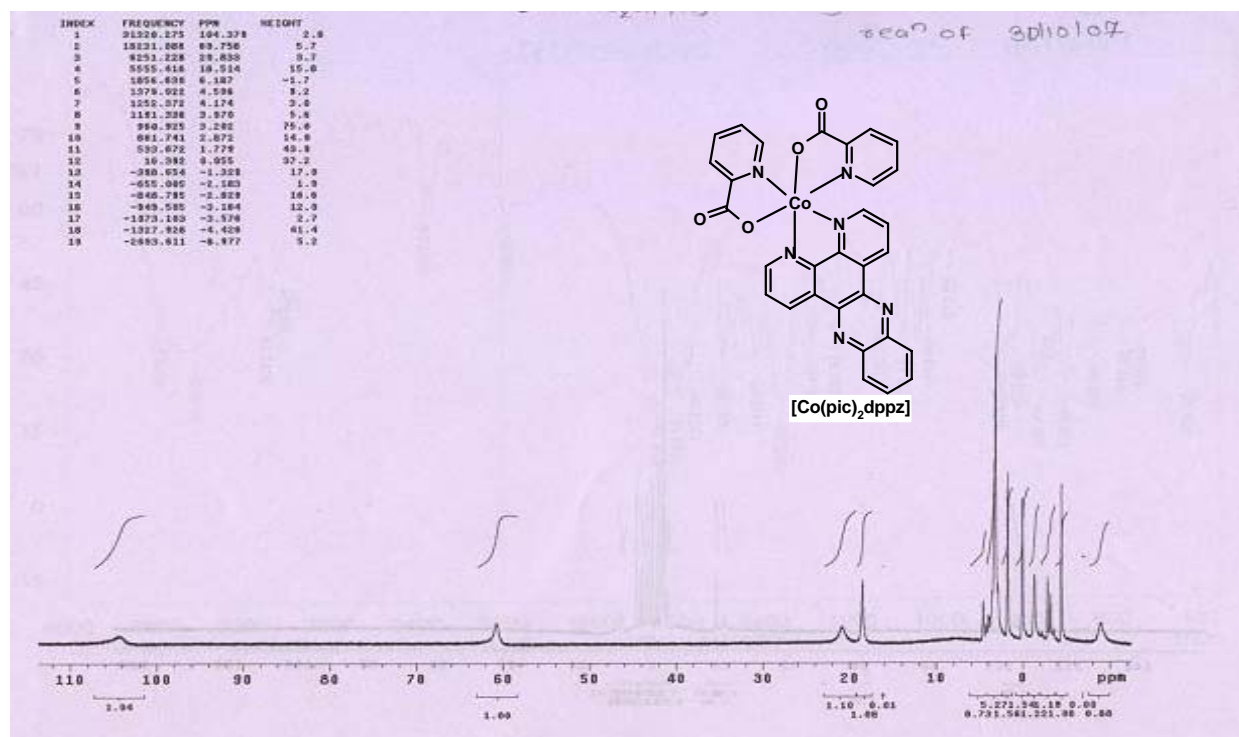

Fig. S14  $^1\text{H}$  NMR of complex **4** in  $\text{CDCl}_3$  solvent.
